# Supplementary material for: Could Contamination Avoidance Be an Endpoint That Protects the Environment? An Overview on How Species Respond to Copper, Glyphosate, and Silver Nanoparticles
Source: MDPI journal article supplement (doi:10.3390/toxics9110301), 2021-11-11
Supplement: s1 [file s1]

# Could contamination avoidance be an endpoint that protects the environment? An overview on how species respond to copper, glyphosate and silver nanoparticles

M. Antonella Alcívar, Marta Sendra, Daniel C.V.R. Silva, Enrique González-Ortegón, Julián Blasco, Ignacio Moreno-Garrido and Cristiano V.M. Araújo

Table S1. copper.

| Group                     | Species                          | Responses /Endpoint                       | Classification of the ecotoxicological responses | EC <sub>50</sub> (µg/L) | References                  |
|---------------------------|----------------------------------|-------------------------------------------|--------------------------------------------------|-------------------------|-----------------------------|
| <b>Freshwater species</b> |                                  |                                           |                                                  |                         |                             |
| Bacteria                  | <i>Pseudomonas fluorescens</i>   | Respirometry                              | Physiological                                    | 56,100                  | Pérez-García et al., 1993   |
| Fungi                     | <i>Saccharomyces cerevisiae</i>  | Respirometry                              | Physiological                                    | 29,300                  | Pérez-García et al., 1993   |
| Rotifers                  | <i>Brachionus calyciflorus</i>   | Swimming alterations: Speed               | Behavioral                                       | 24.2                    | Charoy and Janssen, 1999    |
|                           |                                  | Swimming alterations: Periods of swimming | Behavioral                                       | 20.8                    | Charoy and Janssen, 1999    |
|                           |                                  | Filtration rate                           | Feeding                                          | 10.75                   | Ferrando and Andreu, 1993   |
|                           |                                  | Ingestion rate                            | Feeding                                          | 13.25                   | Ferrando and Andreu, 1993   |
|                           | <i>Lecane hamata</i>             | Esterases-inhibition                      | Biochemical                                      | 210                     | Pérez-Legaspi et al., 2002  |
|                           |                                  | Mortality                                 | Mortality/Immobilization                         | 230                     | Pérez-Legaspi et al., 2002  |
|                           | <i>Lecane luna</i>               | Esterases-inhibition                      | Biochemical                                      | 620                     | Pérez-Legaspi et al., 2002  |
|                           |                                  | Mortality                                 | Mortality/Immobilization                         | 60                      | Pérez-Legaspi et al., 2002  |
|                           | <i>Lecane quadridentata</i>      | Esterases-inhibition                      | Biochemical                                      | 1                       | Pérez-Legaspi et al., 2002  |
|                           |                                  | Mortality                                 | Mortality/Immobilization                         | 330                     | Pérez-Legaspi et al., 2002  |
| Microalgae                | <i>Euglena gracilis</i>          | Motility                                  | Behavioral                                       | 23,400                  | Ahmed and Häder, 2010       |
|                           |                                  | Growth inhibition                         | Growth/Reproduction                              | 1800                    | Girling et al., 2000        |
|                           | <i>Selenastrum capricornutum</i> | Cel division rate inhibition              | Growth/Reproduction                              | 6                       | Franklin et al., 2001       |
|                           | <i>Chlorella</i> sp.             | Cel division rate inhibition              | Growth/Reproduction                              | 6                       | Franklin et al., 2001       |
|                           | <i>Chlamydomonas reinhardi</i>   | Growth inhibition                         | Growth/Reproduction                              | 79                      | Girling et al., 2000        |
|                           | <i>Scenedesmus subspicatus</i>   | Growth inhibition                         | Growth/Reproduction                              | 120                     | Girling et al., 2000        |
|                           | <i>Scenedesmus quadricauda</i>   | Decrease in the surface area              | Growth/Reproduction                              | 275.5                   | Fawaz et al., 2019          |
|                           |                                  | Cell density                              | Growth/Reproduction                              | 14.29                   | Fawaz et al., 2019          |
|                           | <i>Ankistrodesmus angustus</i>   | Decrease in the surface area              | Growth/Reproduction                              | 75.65                   | Fawaz et al., 2019          |
|                           |                                  | Cell density                              | Growth/Reproduction                              | 720.3                   | Fawaz et al., 2019          |
|                           | <i>Oscillatoria prolifera</i>    | Decrease in the surface area              | Growth/Reproduction                              | 50.17                   | Fawaz et al., 2019          |
|                           |                                  | Cell density                              | Growth/Reproduction                              | 50.17                   | Fawaz et al., 2019          |
|                           | <i>Aphanizomenon gracile</i>     | Population growth                         | Growth/Reproduction                              | 64                      | Lüderitz and Nicklish, 1989 |
|                           | <i>Oscillatoria redekei</i>      | Population growth                         | Growth/Reproduction                              | 80                      | Lüderitz and Nicklish, 1989 |
|                           | <i>Chlorella autotrophyca</i>    | Population growth                         | Growth/Reproduction                              | 9,6                     | Moreno-Garrido et al., 2000 |
|                           |                                  | Population growth                         | Growth/Reproduction                              | 19,3                    | Moreno-Garrido et al., 2000 |

|            |                                   |                    |                          |        |                                  |
|------------|-----------------------------------|--------------------|--------------------------|--------|----------------------------------|
|            |                                   | Population growth  | Growth/Reproduction      | 38,3   | Moreno-Garrido et al., 2000      |
| Copepods   | <i>Mesocyclops pehpeiensis</i>    | Inhibition         | Growth/Reproduction      | 25     | Wong and Pak, 2004               |
| Cladocera  | <i>Bosmina longirostris</i>       | Motility           | Mortality/Immobilization | 1.4    | Koivisto et al., 1992            |
|            | <i>Ceriodaphnia cornuta</i>       | Motility           | Mortality/Immobilization | 2.92   | Bui et al., 2016                 |
|            | <i>Ceriodaphnia dubia</i>         | Immobilization     | Mortality/Immobilization | 4.16   | Harmon et al., 2003              |
|            | <i>Chydorus sphaericus</i>        | Motility           | Mortality/Immobilization | 3.3    | Koivisto et al., 1992            |
|            | <i>Daphnia ambigua</i>            | Immobilization     | Mortality/Immobilization | 6.53   | Harmon et al., 2003              |
|            | <i>Daphnia galeata</i>            | Motility           | Mortality/Immobilization | 4.1    | Koivisto et al., 1992            |
|            | <i>Daphnia longispina</i>         | Avoidance          | Spatial avoidance        | 65     | Lopes et al., 2004               |
|            |                                   | Motility           | Mortality/Immobilization | 60     | Lopes et al., 2004               |
|            | <i>Daphnia lumholtzi</i>          | Motility           | Mortality/Immobilization | 3.92   | Bui et al., 2016                 |
|            | <i>Daphnia magna</i>              | Motility           | Mortality/Immobilization | 5.1    | De Schamphelaere y Janssen, 2002 |
|            |                                   | Filtration rate    | Feeding                  | 14.75  | Ferrando and Andreu, 1993        |
|            |                                   | Ingestion rate     | Feeding                  | 22.5   | Ferrando and Andreu, 1993        |
|            | <i>Daphnia pulex</i>              | Motility           | Mortality/Immobilization | 3.4    | Koivisto et al., 1992            |
| Insects    | <i>Adenophlebia auriculata</i>    | Survival           | Mortality/Immobilization | 180    | Gerhardt and Palmer, 1998        |
|            | <i>Drunella grandis</i>           | Survival           | Mortality/Immobilization | 3.0    | Clements et al., 2013            |
|            | <i>Tramea cophysa</i>             | Mortality          | Mortality/Immobilization | 611    | Dos Santos Lima et al., 2019     |
| Ostracoda  | <i>Chlamydotheca</i> sp.          | Mortality          | Mortality/Immobilization | 378    | Dos Santos Lima et al., 2019     |
|            | <i>Strandesia trispinosa</i>      | Mortality          | Mortality/Immobilization | 750    | Dos Santos Lima et al., 2019     |
| Bivalve    | <i>Dreissena polymorpha</i>       | Filtration rate    | Feeding                  | 41     | Kraak et al., 1994               |
|            | <i>Echyridella menziesii</i>      | Survival           | Mortality/Immobilization | 1.7    | Clearwater et al., 2013          |
| Shrimps    | <i>Atyaephyra desmarestii</i>     | Avoidance          | Spatial avoidance        | 70     | Vera-Vera et al., 2019           |
|            |                                   | Avoidance          | Spatial avoidance        | 50     | Araújo et al., 2019              |
|            | <i>Macrobrachium amazonicum</i>   | Survival           | Mortality/Immobilization | 10,010 | Soares et al., 2017              |
|            | <i>Macrobrachium pantanalense</i> | Survival           | Mortality/Immobilization | 2.7    | Soares et al., 2017              |
| Amphibians | <i>Ambystoma opacum</i>           | Mortality          | Mortality/Immobilization | 18.76  | Weir et al., 2019.               |
|            | <i>Ambystoma talpoideum</i>       | Mortality          | Mortality/Immobilization | 47.88  | Weir et al., 2019.               |
|            | <i>Ambystoma tigrinum</i>         | Mortality          | Mortality/Immobilization | 35.3   | Weir et al., 2019.               |
|            | <i>Bufo arenarum</i>              | Mortality          | Mortality/Immobilization | 85     | Herkovits y Helguero, 1998.      |
|            | <i>Epidalea calamita</i>          | Larval mortality   | Mortality/Immobilization | 87.60  | García-Muñoz et al., 2009        |
|            |                                   | Larval mortality   | Mortality/Immobilization | 31.85  | García-Muñoz et al., 2009        |
|            |                                   | Larval mortality   | Mortality/Immobilization | 43.80  | García-Muñoz et al., 2009        |
|            | <i>Lithobates catesbeianus</i>    | Avoidance          | Spatial avoidance        | 101    | Araújo et al., 2014              |
|            | <i>Leptodactylus latrans</i>      | Avoidance          | Spatial avoidance        | 102    | Araújo et al., 2014              |
|            | <i>Pelophylax perezi</i>          | Avoidance          | Spatial avoidance        | 178    | Araújo et al., 2014              |
|            | <i>Rhinella granulosa</i>         | Mortality          | Mortality/Immobilization | 23.48  | Franco-de-Sá and Val, 2014       |
|            | <i>Scinax ruber</i>               | Mortality          | Mortality/Immobilization | 36.37  | Franco-de-Sá and Val, 2014       |
|            |                                   | Mortality          | Mortality/Immobilization | 50.02  | Franco-de-Sá and Val, 2014       |
|            |                                   | Mortality          | Mortality/Immobilization | 15.9   | Franco-de-Sá and Val, 2014       |
| Fish       | <i>Danio rerio</i>                | Feeding Inhibition | Feeding                  | 36     | Abdel-moneim et al, 2015         |
|            |                                   | Avoidance          | Spatial avoidance        | 17     | Silva et al., 2018               |
|            |                                   | Avoidance          | Spatial avoidance        | 60     | Araújo et al., 2018              |
|            |                                   | Avoidance          | Spatial avoidance        | 89     | Araújo et al., 2018              |
|            |                                   | Avoidance          | Spatial avoidance        | 90     | Islam et al., 2019               |
|            |                                   | Avoidance          | Spatial avoidance        | 60     | Araújo et al., 2019              |
|            |                                   | Avoidance          | Spatial avoidance        | 16     | Moreira-Santos et al., 2008      |
|            | <i>Rasbora sumatrana</i>          | Mortality          | Mortality/Immobilization | 5.6    | Shuhaimi-Othman et al., 2015     |

|                          |                                            |                                      |                          |       |                              |
|--------------------------|--------------------------------------------|--------------------------------------|--------------------------|-------|------------------------------|
| Marine/estuarine species | <i>Oncorhynchus mykiss</i>                 | Mortality                            | Mortality/Immobilization | 35.5  | Naddy et al., 2015           |
|                          | <i>Poecilia reticulata</i>                 | Mortality                            | Mortality/Immobilization | 37.9  | Shuhaimi-Othman et al., 2010 |
|                          |                                            | Avoidance                            | Spatial avoidance        | 16    | Silva et al., 2018           |
|                          |                                            |                                      |                          |       |                              |
| Bacteria                 | <i>Vibrio fischeri</i> (Microtox)          | Attenuation of light emission        | Physiological            | 150   | Moreno-Garrido et al., 1999  |
|                          |                                            | Attenuation of light emission        | Physiological            | 120   | Moreno-Garrido et al., 1999  |
|                          |                                            | Luminescence                         | Physiological            | 1300  | Toussaint et al., 1995       |
| Protozoa                 | <i>Pyrocystis lunula</i>                   | Growth rate inhibition               | Growth/Reproduction      | 85    | Stauber et al., 2008         |
| Rotifers                 | <i>Brachionus plicatilis</i>               | Mortality                            | Mortality/Immobilization | 50    | Rotini et al., 2018          |
|                          | <i>Proales similis</i>                     | Mortality                            | Mortality/Immobilization | 1060  | Snell et al., 2019           |
|                          |                                            | Reproduction                         | Growth/Reproduction      | 150   | Snell et al., 2019           |
|                          |                                            | Ingestion                            | Feeding                  | 260   | Snell et al., 2019           |
|                          |                                            | Hatching                             | Growth/Reproduction      | 3400  | Snell et al., 2019           |
| Microalgae               | <i>Cylindrotheca closterium</i>            | Population growth                    | Growth/Reproduction      | 27.8  | Araújo et al., 2010.         |
|                          |                                            | Chlorophyll fluorescence             | Growth/Reproduction      | 4.7   | Araújo et al., 2010.         |
|                          |                                            | Esterase activity                    | Physiological            | 7.8   | Araújo et al., 2010.         |
|                          |                                            | Population growth                    | Growth/Reproduction      | 10.1  | Araújo et al., 2010.         |
|                          | <i>Dunaliella tertiolecta</i>              | Inhibition of oxygen rate production | Growth/Reproduction      | 1461  | Franklin et al., 2001        |
|                          | <i>Gonyaulax tamarensis</i>                | Immobilisation                       | Mortality/Immobilization | 1     | Anderson and Morel, 1978     |
|                          | <i>Isochrysis aff. galbana</i> Clone T-ISO | Population growth                    | Growth/Reproduction      | 0.4   | Moreno-Garrido et al., 2000  |
|                          |                                            | Population growth                    | Growth/Reproduction      | 3.6   | Moreno-Garrido et al., 2000  |
|                          |                                            | Population growth                    | Growth/Reproduction      | 4.4   | Moreno-Garrido et al., 2000  |
|                          | <i>Nannochloris atomus</i>                 | Population growth                    | Growth/Reproduction      | 16.7  | Moreno-Garrido et al., 2000  |
|                          |                                            | Population growth                    | Growth/Reproduction      | 27.3  | Moreno-Garrido et al., 2000  |
|                          |                                            | Population growth                    | Growth/Reproduction      | 46.2  | Moreno-Garrido et al., 2000  |
|                          | <i>Phaeodactylum tricornutum</i>           | Population growth                    | Growth/Reproduction      | 9     | Franklin et al., 2001        |
|                          |                                            | Population growth                    | Growth/Reproduction      | 9.8   | Moreno-Garrido et al., 2000  |
|                          |                                            | Population growth                    | Growth/Reproduction      | 34.4  | Moreno-Garrido et al., 2000  |
|                          |                                            | Population growth                    | Growth/Reproduction      | 35    | Moreno-Garrido et al., 2000  |
|                          | <i>Rhodomonas salina</i>                   | Inhibition of oxygen rate production | Physiological            | 30    | Moreno-Garrido et al., 1999  |
|                          |                                            | Population growth                    | Growth/Reproduction      | 30    | Moreno-Garrido et al., 1999  |
| Copepods                 | <i>Acartia tonsa</i>                       | Egg production / reproduction        | Growth/Reproduction      | 9.9   | Lauer and Bianchini, 2010    |
|                          | <i>Tisbe battagliai</i>                    | Mortality                            | Mortality/Immobilization | 83.1  | Diz, et al., 2009            |
|                          |                                            | Mortality                            | Mortality/Immobilization | 157   | Diz, et al., 2009            |
|                          |                                            | Fecundity                            | Growth/Reproduction      | 30.08 | Diz, et al., 2009            |
|                          |                                            | newborn production                   | Growth/Reproduction      | 44.5  | Diz, et al., 2009            |
|                          | <i>Tigriopus fulvus</i>                    | Mortality                            | Mortality/Immobilization | 310   | Biandolino et al., 2018      |
|                          |                                            | Moult naupliar reduction             | Morphological            | 55.8  | Biandolino et al., 2018      |
|                          |                                            | Development inhibition               | Growth/Reproduction      | 21.7  | Biandolino et al., 2018      |
|                          |                                            | Mortality                            | Mortality/Immobilization | 120   | Rotini et al., 2018          |
|                          |                                            | Release of the molt                  | Growth/Reproduction      | 70    | Rotini et al., 2018          |
|                          | <i>Gladioferens pectinatus</i>             | Survival                             | Mortality/Immobilization | 170   | Charry et al., 2019          |
|                          |                                            | Larval development ratio             | Growth/Reproduction      | 49.8  | Charry et al., 2019          |
|                          |                                            | Realized offspring                   | Growth/Reproduction      | 101.5 | Charry et al., 2019          |
|                          |                                            | Potential offspring                  | Growth/Reproduction      | 127.1 | Charry et al., 2019          |
|                          |                                            | Total offspring                      | Growth/Reproduction      | 94.3  | Charry et al., 2019          |

|               |                                      |                                   |                          |        |                                     |
|---------------|--------------------------------------|-----------------------------------|--------------------------|--------|-------------------------------------|
| Bivalve       | <i>Crassostera virginica</i>         | Embryo-larval development         | Growth/Reproduction      | 11.2   | Arnold et al., 2010                 |
|               | <i>Mytilus galloprovincialis</i>     | Embryo-larval development         | Growth/Reproduction      | 6.28   | Arnold et al., 2010                 |
| Annelids      | <i>Neanthes arenaceodentata</i>      | Feeding rate                      | Feeding                  | 72     | Rosen and Miller, 2011.             |
|               | <i>Ficopomatus enigmaticus</i>       | Sperm toxicity/Fertilization rate | Growth/Reproduction      | 80     | Oliva et al., 2017                  |
|               |                                      | Mortality                         | Mortality/Immobilization | 80     | Rosen y Miller, 2011.               |
| Echinodermata | <i>Dendraster excentricus</i>        | Embryo-larval development         | Growth/Reproduction      | 18.9   | Arnold et al., 2010                 |
|               | <i>Paracentrotus lividus</i>         | Embryonic malformations           | Morphological            | 40.65  | Morroni et al., 2018.               |
|               |                                      | Fertilization rate                | Growth/Reproduction      | 20     | Rotini et al., 2018.                |
|               | <i>Strongylocentrotus purpuratus</i> | Embryo-larval development         | Growth/Reproduction      | 14.8   | Arnold et al., 2010                 |
| Cnidaria      | <i>Acropora aspera</i>               | Inhibition in fertilisation       | Growth/Reproduction      | 78     | Gissi et al., 2017                  |
|               | <i>Aiptasia pallida</i>              | Inhibited development             | Growth/Reproduction      | 5      | Howe et al., 2014                   |
|               |                                      | Mortality                         | Mortality/Immobilization | 23     | Howe et al., 2014                   |
|               | <i>Exaiptasia pallida</i>            | Reproduction                      | Growth/Reproduction      | 23     | Trenfield et al., 2017              |
|               |                                      | Mortality                         | Mortality/Immobilization | 148    | Trenfield et al., 2017              |
|               | <i>Platygyra daedalea</i>            | Inhibition in fertilisation       | Growth/Reproduction      | 28     | Gissi et al., 2017                  |
| Gastropods    | <i>Haliotis rubra</i>                | Morphological abnormalities       | Morphological            | 7.10   | Gorski and Nugegoda, 2006           |
|               | <i>Nassarius dorsatus</i>            | Growth rate                       | Growth/Reproduction      | 4.7    | Trenfield et al., 2016              |
| Crustacean    | <i>Artemia franciscana</i>           | Mortality                         | Mortality/Immobilization | 1280   | Rotini et al., 2018                 |
|               |                                      | Swimming speed alteration         | Behavioral               | 638.54 | Manfra et al., 2016                 |
|               | <i>Balanus amphitrite</i>            | Survivorship                      | Mortality/Immobilization | 145    | Qiu et al., 2005                    |
|               |                                      | Molting success                   | Growth/Reproduction      | 97     | Qiu et al., 2005                    |
|               |                                      | Survivorship                      | Mortality/Immobilization | 156    | Qiu et al., 2005                    |
|               |                                      | Molting success                   | Growth/Reproduction      | 91     | Qiu et al., 2005                    |
|               |                                      | Survivorship                      | Mortality/Immobilization | 213    | Qiu et al., 2005                    |
|               |                                      | Molting success                   | Growth/Reproduction      | 129    | Qiu et al., 2005                    |
|               | <i>Exosphaeroma gigas</i>            | Immobility                        | Mortality/Immobilization | 6960   | Giarratano et al., 2007             |
|               |                                      | Immobility                        | Mortality/Immobilization | 2110   | Giarratano et al., 2007             |
| Shrimps       | <i>Litopenaeus vannamei</i>          | Avoidance                         | Spatial avoidance        | 11     | Redondo-López et al. (under review) |
|               | <i>Palaemon varians</i>              | Avoidance                         | Spatial avoidance        | 10     | Araújo et al., 2020.                |
|               |                                      | Avoidance                         | Spatial avoidance        | 43     | Redondo-López et al. (under review) |
|               | <i>Penaeus monodon</i>               | Mortality                         | Mortality/Immobilization | 1246   | Chen and Lin, 2001                  |
|               |                                      | Mortality                         | Mortality/Immobilization | 3078   | Chen and Lin, 2001                  |
|               |                                      | Reduced length increase           | Growth/Reproduction      | 667    | Chen and Lin, 2001                  |
| Crabs         | <i>Carcinus maenas</i>               | Mortality                         | Mortality/Immobilization | 2000   | Nonnote et al., 1993                |
|               | <i>Chasmagnathus granulata</i>       | Loss of spawning                  | Growth/Reproduction      | 163.4  | Zapata et al., 2001.                |
| Fish          | <i>Centropomus parallelus</i>        | Mortality                         | Mortality/Immobilization | 1880   | Oliveira et al., 2014               |
|               | <i>Pomatoschistus microps</i>        | Mortality                         | Mortality/Immobilization | 568.1  | Vieira et al., 2009                 |
|               | <i>Rachycentron canadum</i>          | Avoidance                         | Spatial avoidance        | 800    | Araújo et al., 2016                 |

Table S2. glyphosate.

| Group              | Species                       | Responses /Endpoint | Classification of the ecotoxicological responses | EC <sub>50</sub> mg/L | References                                   |
|--------------------|-------------------------------|---------------------|--------------------------------------------------|-----------------------|----------------------------------------------|
| Freshwater species |                               |                     |                                                  |                       |                                              |
| Protozoa           | <i>Tetrahymena pyriformis</i> | Growth              | Growth/Reproduction                              | 29.5                  | Tsui and Chu, 2003.                          |
| Microalgae         | <i>Scenedesmus vacuolatus</i> | Growth rate         | Growth/Reproduction                              | 4.9                   | Iummato et al., 2019                         |
|                    |                               | Growth              | Growth/Reproduction                              | 4.9                   | Lummato et al., 2019                         |
|                    | <i>Microcystis aeruginosa</i> | Growth              | Growth/Reproduction                              | 6.3                   | Zhang et el., 2018                           |
|                    |                               | Growth              | Growth/Reproduction                              | 0.001486              | Hernández-García and Martínez-Jerónimo, 2020 |
|                    |                               | Growth              | Growth/Reproduction                              | 6.7                   | Lipok et al., 2010                           |
|                    |                               | Growth              | Growth/Reproduction                              | 251.4                 | Lipok et al., 2010                           |
|                    |                               | Growth              | Growth/Reproduction                              | 81                    | Zhang et al., 2018                           |
|                    |                               | Growth              | Growth/Reproduction                              | 63                    | Zhang et al., 2018                           |

|            |                                             |                   |                          |          |                                              |
|------------|---------------------------------------------|-------------------|--------------------------|----------|----------------------------------------------|
|            | <i>Microcystis aeruginosa</i> (nontoxic)    | Growth            | Growth/Reproduction      | 0.441    | Smedbol et al., 2017                         |
|            | <i>Microcystis aeruginosa</i> (toxic)       | Growth            | Growth/Reproduction      | 0.446    | Smedbol et al., 2017                         |
|            | <i>Microcystis</i> sp.                      | Growth            | Growth/Reproduction      | 0.406    | Smedbol et al., 2017                         |
|            | <i>Chlorella pyrenoidosa</i>                | Growth            | Growth/Reproduction      | 0.396    | Anton et al., 1993.                          |
|            | <i>Selenastrum capricornutum</i>            | Growth inhibition | Growth/Reproduction      | 5.81     | Tsui and Chu, 2003                           |
|            |                                             | Growth            | Growth/Reproduction      | 24.7     | Tsui and Chu, 2003                           |
|            |                                             | Growth            | Growth/Reproduction      | 41       | Tsui and Chu, 2003                           |
|            |                                             | Growth            | Growth/Reproduction      | 3.92     | Tsui and Chu, 2003                           |
|            |                                             | Growth            | Growth/Reproduction      | 5.81     | Tsui and Chu, 2003                           |
|            | <i>Scenedesmus obliquus</i>                 | Growth            | Growth/Reproduction      | 0.422    | Smedbol et al., 2017                         |
|            | <i>Oocystis lacustris</i>                   | Growth            | Growth/Reproduction      | 0.415    | Smedbol et al., 2017                         |
|            | <i>Chlamydomonas reinhardtii</i>            | Growth            | Growth/Reproduction      | 0.551    | Smedbol et al., 2017                         |
|            | <i>Cryptomonas obovata</i>                  | Growth            | Growth/Reproduction      | 0.584    | Smedbol et al., 2017                         |
|            | <i>Ankistrodesmus falcatus</i>              | Growth            | Growth/Reproduction      | 0.649    | Smedbol et al., 2017                         |
|            |                                             | Growth            | Growth/Reproduction      | 0.001411 | Hernández-García and Martínez-Jerónimo, 2020 |
|            | <i>Pseudokirchneriella subcapitata</i>      | Growth            | Growth/Reproduction      | 0.001022 | Hernández-García and Martínez-Jerónimo, 2020 |
|            | <i>Chlorella vulgaris</i>                   | Growth            | Growth/Reproduction      | 0.001908 | Hernández-García and Martínez-Jerónimo, 2020 |
|            |                                             | Growth            | Growth/Reproduction      | 0.24     | Rodríguez-Gil et al., 2017                   |
|            |                                             | Growth            | Growth/Reproduction      | 0.54     | Rodríguez-Gil et al., 2017                   |
|            |                                             | Growth            | Growth/Reproduction      | 118.1    | Lipok et al., 2010                           |
|            |                                             | Growth            | Growth/Reproduction      | 292      | Lipok et al., 2010                           |
|            | <i>Scenedesmus incrasatulus</i>             | Growth            | Growth/Reproduction      | 0.002702 | Hernández-García and Martínez-Jerónimo, 2020 |
|            | <i>Raphidocelis subcapitata</i>             | Growth            | Growth/Reproduction      | 0.201    | Rodríguez-Gil et al., 2017                   |
|            |                                             | Growth            | Growth/Reproduction      | 0.69     | Rodríguez-Gil et al., 2017                   |
|            | <i>Oophila</i> sp.                          | Growth            | Growth/Reproduction      | 1.98     | Rodríguez-Gil et al., 2017                   |
|            |                                             | Growth            | Growth/Reproduction      | 1.61     | Rodríguez-Gil et al., 2017                   |
|            | <i>Chlorella pyrenoidosa</i>                | Growth            | Growth/Reproduction      | 0.396    | Anton et al., 1993                           |
|            |                                             | Growth            | Growth/Reproduction      | 0.38     | Anton et al., 1993                           |
|            |                                             | Growth            | Growth/Reproduction      | 1.08     | Anton et al., 1993                           |
|            | <i>Spirulina platensis</i>                  | Growth            | Growth/Reproduction      | 33.1     | Lipok et al., 2010                           |
|            | <i>Nostoc punctiforme</i>                   | Growth            | Growth/Reproduction      | 42.3     | Lipok et al., 2010                           |
|            |                                             | Growth            | Growth/Reproduction      | 598.4    | Lipok et al., 2010                           |
|            | <i>Anabaena catenula</i>                    | Growth            | Growth/Reproduction      | 2.9      | Lipok et al., 2010                           |
|            |                                             | Growth            | Growth/Reproduction      | 256.5    | Lipok et al., 2010                           |
|            | <i>Synechocystis aquatilis</i>              | Growth            | Growth/Reproduction      | 89.8     | Lipok et al., 2010                           |
|            |                                             | Growth            | Growth/Reproduction      | 164.9    | Lipok et al., 2010                           |
|            | <i>Leptolyngbya boryana</i>                 | Growth            | Growth/Reproduction      | 4.1      | Lipok et al., 2010                           |
|            |                                             | Growth            | Growth/Reproduction      | 246.6    | Lipok et al., 2010                           |
|            | <i>Chlorella kessleri</i> (tolerant strain) | Growth            | Growth/Reproduction      | 55.62    | Romero et al., 2011                          |
| Insects    | <i>Chironomus plumosus</i>                  | Immobility        | Mortality/Immobilization | 55       | Folmar et al., 1979                          |
| Cladocera  | <i>Ceriodaphnia dubia</i>                   | Mortality         | Mortality/Immobilization | 5.39     | Tsui and Chu, 2003                           |
|            | <i>Daphnia magna</i>                        | Mortality         | Mortality/Immobilization | 199      | Demetrio et al., 2014                        |
|            |                                             | Mortality         | Mortality/Immobilization | 9.34     | Demetrio et al., 2014                        |
|            |                                             | Immobility        | Mortality/Immobilization | 62       | Alberdi et al., 1996                         |
|            | <i>Daphnia spinulata</i>                    | Immobility        | Mortality/Immobilization | 66       | Alberdi et al., 1996                         |
| Amphibians | <i>Lymnodynastes dorsalis</i>               | Mortality         | Mortality/Immobilization | 3        | Mann and Bidwell, 1999                       |
|            |                                             | Mortality         | Mortality/Immobilization | 12       | Mann and Bidwell, 1999                       |
|            | <i>Litoria moorei</i>                       | Mortality         | Mortality/Immobilization | 2.9      | Mann and Bidwell, 1999                       |

|                     |                            |                                                     |                          |                        |                            |      |                    |
|---------------------|----------------------------|-----------------------------------------------------|--------------------------|------------------------|----------------------------|------|--------------------|
|                     |                            | Mortality                                           | Mortality/Immobilization | 10.4                   | Mann and Bidwell, 1999     |      |                    |
|                     | <i>Heleioporus eyrei</i>   | Mortality                                           | Mortality/Immobilization | 6.3                    | Mann and Bidwell, 1999     |      |                    |
|                     | <i>Crinia insignifera</i>  | Mortality                                           | Mortality/Immobilization | 3.6                    | Mann and Bidwell, 1999     |      |                    |
|                     | <i>Xenopus laevis</i>      | Mortality                                           | Mortality/Immobilization | 9.3                    | Perkins et al., 2009       |      |                    |
|                     | <i>Rana temporaria</i>     | Mortality                                           | Mortality/Immobilization | 11.1                   | Wagner et al., 2017        |      |                    |
|                     |                            | Mortality                                           | Mortality/Immobilization | 10.4                   | Wagner et al., 2017        |      |                    |
|                     |                            | Mortality                                           | Mortality/Immobilization | 12.2                   | Wagner et al., 2017        |      |                    |
|                     |                            | Teratogenic                                         | Morphological            | 15.7                   | Wagner et al., 2017        |      |                    |
|                     |                            | Teratogenic                                         | Morphological            | 12.4                   | Wagner et al., 2017        |      |                    |
|                     | <i>Rana clamitans</i>      | Mortality                                           | Mortality/Immobilization | 2.7                    | Wojtaszek et al., 2004     |      |                    |
| <i>Rana pipiens</i> | Mortality                  | Mortality/Immobilization                            | 4.25                     | Wojtaszek et al., 2004 |                            |      |                    |
| Fish                | <i>Salmo gairdneri</i>     | Mortality                                           | Mortality/Immobilization | 140                    | Folmar et al., 1979        |      |                    |
|                     | <i>Pimpehales promelas</i> | Mortality                                           | Mortality/Immobilization | 97                     | Folmar et al., 1979        |      |                    |
|                     | <i>Ictalurus punctatus</i> | Mortality                                           | Mortality/Immobilization | 130                    | Folmar et al., 1979        |      |                    |
|                     | <i>Lepomis macrochirus</i> | Mortality                                           | Mortality/Immobilization | 140                    | Folmar et al., 1979        |      |                    |
|                     | <i>Cyprinus carpio</i>     | Mortality                                           | Mortality/Immobilization | 620                    | Nešković et al., 1996      |      |                    |
|                     |                            | Mortality                                           | Mortality/Immobilization | 520.77                 | Ma and Li, 2015            |      |                    |
|                     | <i>Danio rerio</i>         | Avoidance                                           | Spatial avoidance        | 0.0015                 | Mena et al. (under review) |      |                    |
| Aquatic Plant       | <i>Lemna minor</i>         | Inhibition of growth rate                           | Growth/Reproduction      | 0.40222                | Sikorski et al., 2019      |      |                    |
|                     |                            | Inhibition in field (Iy)                            | Growth/Reproduction      | 0.47996                | Sikorski et al., 2019      |      |                    |
|                     |                            | Fresh mass of new fronds                            | Growth/Reproduction      | 0.57629                | Sikorski et al., 2019      |      |                    |
|                     |                            | Dry mass                                            | Growth/Reproduction      | 2.72935                | Sikorski et al., 2019      |      |                    |
|                     |                            | Shikimic acid content                               | Biochemical              | 0.10985                | Sikorski et al., 2019      |      |                    |
|                     |                            | Chlorophyll SPAD                                    | Physiological            | 1.47199                | Sikorski et al., 2019      |      |                    |
|                     |                            | Chlorophyll a content                               | Physiological            | 1.35876                | Sikorski et al., 2019      |      |                    |
|                     |                            | Chlorophyll b content                               | Physiological            | 1.32496                | Sikorski et al., 2019      |      |                    |
|                     |                            | Carotenoid content                                  | Biochemical              | 1.69507                | Sikorski et al., 2019      |      |                    |
|                     |                            | Max. quantum efficiency (Fv/Fm)                     | Physiological            | 3.04538                | Sikorski et al., 2019      |      |                    |
|                     |                            | SAMDC activity - S-adenosylmethionine decarboxylase | Biochemical              | 0.09464                | Sikorski et al., 2019      |      |                    |
|                     |                            | ODC activity - ornithine decarboxylase              | Biochemical              | 1.44833                | Sikorski et al., 2019      |      |                    |
|                     |                            | LDC activity - lysine decarboxylase                 | Biochemical              | 1.46354                | Sikorski et al., 2019      |      |                    |
|                     |                            | TDC activity - tyrosine decarboxylase               | Biochemical              | 1.62071                | Sikorski et al., 2019      |      |                    |
|                     |                            | Tyramine content                                    | Biochemical              | 0.92612                | Sikorski et al., 2019      |      |                    |
|                     |                            | Putrescine content                                  | Biochemical              | 0.86528                | Sikorski et al., 2019      |      |                    |
|                     |                            | Cadaverine content                                  | Biochemical              | 0.88894                | Sikorski et al., 2019      |      |                    |
|                     |                            | Spermidine content                                  | Biochemical              | 0.78078                | Sikorski et al., 2019      |      |                    |
|                     |                            | Spermine content                                    | Biochemical              | 0.90077                | Sikorski et al., 2019      |      |                    |
|                     |                            | Total biogenic amines content                       | Biochemical              | 0.8619                 | Sikorski et al., 2019      |      |                    |
|                     |                            | Peroxidase activity                                 | Biochemical              | 0.57798                | Sikorski et al., 2019      |      |                    |
|                     |                            | Catalase activity                                   | Biochemical              | 0.9971                 | Sikorski et al., 2019      |      |                    |
|                     |                            | Marine/estuarine species                            |                          |                        |                            |      |                    |
|                     |                            | Bacteria                                            | <i>Vibrio fischeri</i>   | Luminescence           | Physiological              | 17.5 | Tsui and Chu, 2003 |

|            |                               |           |                          |      |                    |
|------------|-------------------------------|-----------|--------------------------|------|--------------------|
| Protozoa   | <i>Euplotes vannus</i>        | Growth    | Growth/Reproduction      | 10.1 | Tsui and Chu, 2003 |
| Microalgae | <i>Skeletonema costatum</i>   | Growth    | Growth/Reproduction      | 1.85 | Tsui and Chu, 2003 |
|            |                               | Growth    | Growth/Reproduction      | 5.89 | Tsui and Chu, 2003 |
|            |                               | Growth    | Growth/Reproduction      | 3.35 | Tsui and Chu, 2003 |
|            |                               | Growth    | Growth/Reproduction      | 2.27 | Tsui and Chu, 2003 |
|            | <i>Arthrospira fusiformis</i> | Growth    | Growth/Reproduction      | 28.2 | Lipok et al., 2010 |
| Copepods   | <i>Acartia tonsa</i>          | Mortality | Mortality/Immobilization | 1.77 | Tsui and Chu, 2003 |

Table S3. Ag-NPs.

| Group                     | Species                                | Responses /Endpoint       | Classification of the ecotoxicological responses | EC <sub>50</sub> (ug/L) | References                    |
|---------------------------|----------------------------------------|---------------------------|--------------------------------------------------|-------------------------|-------------------------------|
| <b>Freshwater species</b> |                                        |                           |                                                  |                         |                               |
| Microalgae                | <i>Raphidocelis subcapitata</i>        | Photosynthetic efficiency | Physiological                                    | 21,200                  | Wang et al., 2012             |
|                           |                                        | Photosynthetic efficiency | Physiological                                    | 4100                    | Wang et al., 2012             |
|                           | <i>Chlamydomonas reinhardtii</i>       | Photosynthetic yield      | Physiological                                    | 20.3                    | Navarro et al., 2008          |
|                           |                                        | Photosynthetic yield      | Physiological                                    | 19.8                    | Navarro et al., 2008          |
|                           |                                        | Photosynthetic yield      | Physiological                                    | 21.5                    | Navarro et al., 2008          |
|                           |                                        | Photosynthetic yield      | Physiological                                    | 356                     | Navarro et al., 2008          |
|                           |                                        | Photosynthetic yield      | Physiological                                    | 113                     | Navarro et al., 2008          |
|                           |                                        | Photosynthetic yield      | Physiological                                    | 95                      | Navarro et al., 2008          |
|                           |                                        | Photosynthetic yield      | Physiological                                    | 86                      | Navarro et al., 2008          |
|                           |                                        | Photosynthetic yield      | Physiological                                    | 89                      | Navarro et al., 2008          |
|                           |                                        | Photosynthetic yield      | Physiological                                    | 321                     | Navarro et al., 2012          |
|                           |                                        | Photosynthetic yield      | Physiological                                    | 139                     | Navarro et al., 2012          |
|                           |                                        | Photosynthetic yield      | Physiological                                    | 231                     | Navarro et al., 2012          |
|                           |                                        | Photosynthetic yield      | Physiological                                    | 306                     | Navarro et al., 2012          |
|                           |                                        | Photosynthetic yield      | Physiological                                    | 84                      | Navarro et al., 2012          |
|                           |                                        | Photosynthesis            | Physiological                                    | 138                     | Piccapietra et al., 2012      |
|                           |                                        | Photosynthesis            | Physiological                                    | 62.6                    | Piccapietra et al., 2012      |
|                           |                                        | Photosynthesis            | Physiological                                    | 1078                    | Dewez & Oukarroum, 2012       |
|                           | <i>Thalassiosira weissflogii</i>       | Growth                    | Growth/Reproduction                              | 1003                    | Bielmyer-Fraser et al., 2014  |
|                           | <i>Pseudokirchneriella subcapitata</i> | Growth                    | Growth/Reproduction                              | 3.02                    | Angel et al., 2013            |
|                           |                                        | Growth                    | Growth/Reproduction                              | 3.2                     | Angel et al., 2013            |
|                           |                                        | Growth                    | Growth/Reproduction                              | 32.4                    | Ribeiro et al., 2014          |
|                           |                                        | Growth                    | Growth/Reproduction                              | 9.9                     | Kennedy et al., 2014          |
|                           |                                        | Growth                    | Growth/Reproduction                              | 115.4                   | Tuominen et al., 2013         |
|                           |                                        | Growth                    | Growth/Reproduction                              | 51.8                    | Tuominen et al., 2013         |
|                           | <i>Synechococcus</i> sp.               | Growth                    | Growth/Reproduction                              | 1079                    | Burchardt et al., 2012        |
|                           | <i>Mixed periphyton</i>                | PS yield                  | Physiological                                    | 8953                    | Gil - Allué et al., 2015      |
|                           |                                        | respiration               | Physiological                                    | 2373                    | Gil - Allué et al., 2015      |
|                           |                                        | GLU activity              | Physiological                                    | 1834                    | Gil - Allué et al., 2015      |
|                           |                                        | LAP activity              | Physiological                                    | 2480                    | Gil - Allué et al., 2015      |
| Annelids                  | <i>Caenorhabditis elegans</i>          | Mortality                 | Mortality/Immobilization                         | 13400                   | Ellegaard-Jensen et al., 2012 |
|                           |                                        | Mortality                 | Mortality/Immobilization                         | 2800                    | Ellegaard-Jensen et al., 2012 |
| Cladocera                 | <i>Daphnia magna</i>                   | Mortality                 | Mortality/Immobilization                         | 4                       | Asghari et al., 2012          |
|                           |                                        | Mortality                 | Mortality/Immobilization                         | 2                       | Asghari et al., 2012          |
|                           |                                        | Immobilization            | Mortality/Immobilization                         | 0.75                    | Lee et al., 2012              |
|                           |                                        | Immobilization            | Mortality/Immobilization                         | 1                       | Kim et al., 2011              |
|                           |                                        | Immobilization            | Mortality/Immobilization                         | 1.4                     | Kim et al., 2011              |
|                           |                                        | Immobilization            | Mortality/Immobilization                         | 7                       | Hoheisel et al. 2012          |
|                           |                                        | Immobilization            | Mortality/Immobilization                         | 10                      | Hoheisel et al. 2012          |

|      |                                |                                 |                          |        |                                |
|------|--------------------------------|---------------------------------|--------------------------|--------|--------------------------------|
|      |                                | Immobilization                  | Mortality/Immobilization | 20     | Hoheisel et al. 2012           |
|      |                                | Immobilization                  | Mortality/Immobilization | 30     | Hoheisel et al. 2012           |
|      |                                | Immobilization                  | Mortality/Immobilization | 30     | Hoheisel et al. 2012           |
|      |                                | Immobilization                  | Mortality/Immobilization | 10     | Jo et al., 2012                |
|      |                                | Immobilization                  | Mortality/Immobilization | 10     | Poynton et al., 2012           |
|      |                                | Immobilization                  | Mortality/Immobilization | 4      | Poynton et al., 2012           |
|      |                                | Immobilization                  | Mortality/Immobilization | 30     | Zhao and Wang, 2011            |
|      |                                | Immobilization                  | Mortality/Immobilization | 2      | Zhao and Wang, 2011            |
|      |                                | Immobilization                  | Mortality/Immobilization | 1      | Zhao and Wang, 2011            |
|      |                                | Immobilization                  | Mortality/Immobilization | 1      | Kim et al., 2011               |
|      |                                | Immobilization                  | Mortality/Immobilization | 2      | Kim et al., 2011               |
|      |                                | Immobilization                  | Mortality/Immobilization | 20     | Blinova et al., 2012           |
|      |                                | Immobilization                  | Mortality/Immobilization | 40     | Blinova et al., 2012           |
|      | <i>Ceriodaphnia dubia</i>      | mortality and/or immobilization | Mortality/Immobilization | 221    | McLaughlin and Bonzongo, 2012. |
|      |                                | Immobilization                  | Mortality/Immobilization | 5      | Kennedy et al., 2012           |
|      |                                | Immobilization                  | Mortality/Immobilization | 30     | Kennedy et al., 2012           |
|      | <i>Daphnia pulex</i>           | Immobilization                  | Mortality/Immobilization | 40     | Griffitt et al. 2008           |
| Fish | <i>Oryzias latipes</i>         | Survival                        | Mortality/Immobilization | 28     | Kim et al. 2011                |
|      |                                | Survival                        | Mortality/Immobilization | 67     | Kim et al. 2011                |
|      |                                | Mortality                       | Mortality/Immobilization | 1380   | Wu and Zhou, 2013              |
|      |                                | Mortality                       | Mortality/Immobilization | 1120   | Wu and Zhou, 2013              |
|      |                                | Mortality                       | Mortality/Immobilization | 870    | Wu and Zhou, 2013              |
|      |                                | Mortality                       | Mortality/Immobilization | 10,000 | Kwok et al., 2012              |
|      |                                | Mortality                       | Mortality/Immobilization | 2500   | Kwok et al., 2012              |
|      |                                | Mortality                       | Mortality/Immobilization | 10,000 | Kwok et al., 2012              |
|      |                                | Mortality                       | Mortality/Immobilization | 30     | Chae et al., 2009              |
|      |                                | Mortality                       | Mortality/Immobilization | 1390   | Kashiwada et al., 2012         |
|      | <i>Pimephales promelas</i>     | Mortality                       | Mortality/Immobilization | 90     | Hoheisel et al., 2012.         |
|      | <i>Danio rerio</i>             | Mortality                       | Mortality/Immobilization | 1610   | Wang et al., 2012              |
|      |                                | Mortality                       | Mortality/Immobilization | 1360   | Wang et al., 2012              |
|      |                                | Mortality                       | Mortality/Immobilization | 780    | Wang et al., 2012              |
|      |                                | Avoidance                       | Spatial avoidance        | 2.5    | The current study              |
|      | <i>Oreochromis mossambicus</i> | Morphological                   | Morphological            | 12,600 | Govindasamy and Rahuman, 2012  |
|      | <i>Pimephales promelas</i>     | Mortality                       | Mortality/Immobilization | 9400   | Laban et al., 2010             |



|                          |                                  |                      |                          |                    |                        |
|--------------------------|----------------------------------|----------------------|--------------------------|--------------------|------------------------|
|                          |                                  | Mortality            | Mortality/Immobilization | 11,250             | Laban et al., 2010     |
|                          |                                  | Mortality            | Mortality/Immobilization | 10,600             | Laban et al., 2010     |
|                          |                                  | Mortality            | Mortality/Immobilization | 1360               | Laban et al., 2010     |
| Aquatic plant            | <i>Lemna minor</i>               | Fronnd number        | Growth/Reproduction      | 38.06              | Gubbins et al., 2011   |
|                          |                                  | Fronnd number        | Growth/Reproduction      | 42.51              | Gubbins et al., 2011   |
|                          | <i>Spirodela polyrhiza</i>       | Fresh weight         | Growth/Reproduction      | 13,670             | Jiang et al., 2012     |
|                          |                                  | Dry weight           | Mortality/Immobilization | 13,670             | Jiang et al., 2012     |
|                          |                                  | ChlA                 | Physiological            | 16,100             | Jiang et al., 2012     |
|                          |                                  | Phosphate–phosphorus | Physiological            | 17,330             | Jiang et al., 2012     |
|                          | Nitrate–nitrogen                 | Physiological        | 4540                     | Jiang et al., 2012 |                        |
| Marine/estuarine species |                                  |                      |                          |                    |                        |
| Microalgae               | <i>Phaeodactylum tricornutum</i> | Growth               | Growth/Reproduction      | 162,5              | Sendra et al, 2017     |
|                          |                                  | Growth               | Growth/Reproduction      | 100,3              | Pérez et al., 2014     |
|                          |                                  | Growth               | Growth/Reproduction      | 2384               | Angel et al., 2013     |
|                          |                                  | Growth               | Growth/Reproduction      | 6925               | Angel et al., 2013     |
|                          | <i>Chlorella autotrophica</i>    | Growth               | Growth/Reproduction      | 570                | Sendra et al., 2018    |
|                          |                                  | Cell viability       | Physiological            | 320                | Sendra et al., 2018    |
|                          |                                  | cell complexity      | Physiological            | 1490               | Sendra et al., 2018    |
|                          |                                  | EQY                  | Physiological            | 1340               | Sendra et al., 2018    |
|                          |                                  | active Chlorophyll   | Physiological            | 220                | Sendra et al., 2018    |
|                          |                                  | ROS                  | Physiological            | 200                | Sendra et al., 2018    |
|                          | <i>Dunaliella salina</i>         | Growth               | Growth/Reproduction      | 640                | Sendra et al., 2018    |
|                          |                                  | Chla                 | Physiological            | 3500               | Sendra et al., 2018    |
|                          |                                  | EQY                  | Physiological            | 2500               | Sendra et al., 2018    |
|                          |                                  | active Chlorophyll   | Physiological            | 780                | Sendra et al., 2018    |
|                          | <i>Cylindrotheca closterium</i>  | Growth               | Growth/Reproduction      | 239.5              | Pérez et al., 2014     |
|                          | <i>Nitzchia palea</i>            | Growth               | Growth/Reproduction      | 76.6               | Pérez et al., 2014     |
|                          | <i>Thalassiosira pseudonana</i>  | Growth               | Growth/Reproduction      | 1079               | Burchardt et al., 2012 |

## References

1. Abdel-Moneim, A.; Moreira-Santos, M.; Ribeiro, R. A short-term sublethal toxicity assay with zebra fish based on preying rate and its integration with mortality. *Chemosphere*. **2015**, *120*, 568–574.
2. Ahmed, H.; Häder, D.P. A fast algal bioassay for assessment of copper toxicity in water using *Euglena gracilis*. *J. Appl. Phycol.* **2010**, *22*(6), 785–792.
3. Anderson, D.M.; Morel, F.M. Copper sensitivity of *Gonyaulax tamarensis* 1. *Limnology and Oceanography*. **1978**, *23*(2), 283–295.
4. Araújo, C.V.; Diz, F.R.; Lubián, L.M.; Blasco, J.; Moreno-Garrido, I. Sensitivity of *Cylindrotheca closterium* to copper: Influence of three test endpoints and two test methods. *Sci. Total Environ.* **2010**, *408*(17), 3696–3703.
5. Araújo, C.V.; Shinn, C.; Moreira-Santos, M.; Lopes, I.; Espíndola, E.L.; Ribeiro, R. Copper-driven avoidance and mortality in temperate and tropical tadpoles. *Aquat. Toxicol.* **2014**, *146*, 70–75.
6. Araújo, C.V.; Cedeño-Macías, L.A.; Vera-Vera, V.C.; Salvatierra, D.; Rodríguez, E.N.; Zambrano, U.; Kuri, S. Predicting the effects of copper on local population decline of 2 marine organisms, cobia fish and whiteleg shrimp, based on avoidance response. *Environ. Toxicol. Chem.* **2016**, *35*(2), 405–410.
7. Araújo, C.V.; Roque, D.; Blasco, J.; Ribeiro, R.; Moreira-Santos, M.; Toribio, A.; Aguirre, E.; Barro, S. Stress-driven emigration in complex field scenarios of habitat disturbance: The heterogeneous multi-habitat assay system (HeMHAS). *Sci Total Environ.* **2018**, *644*, 31–36.
8. Araújo, C.V.; Pontes, J.R.S.; Blasco, J. Might the interspecies interaction between fish and shrimps change the pattern of their avoidance response to contamination? *Ecotoxicol. Environ. Saf.* **2019**, *186*, 109757.
9. Araújo, C.V.; Rodríguez-Romero, A.; Fernández, M.; Sparaventi, E.; Medina, M.M.; Tovar-Sánchez, A. Repellency and mortality effects of sunscreens on the shrimp *Palaemon varians*: Toxicity dependent on exposure method. *Chemosphere*. **2020**, 127190.
10. Arnold, W.R.; Cotsifas, J.S.; Ogle, R.S.; DePalma, S.G.; Smith, D.S. A comparison of the copper sensitivity of six invertebrate species in ambient salt water of varying dissolved organic matter concentrations. *Environ. Toxicol. Chem.* **2010**, *29*(2), 311–319.
11. Biantolino, F.; Parlapiano, I.; Faraponova, O.; Prato, E. Effects of short- and long-term exposures to copper on lethal and reproductive endpoints of the harpacticoid copepod *Tigriopus fulvus*. *Ecotoxicol. Environ. Saf.* **2018**, *147*, 327–333.
12. Bui, T.K.L.; Do-Hong, L.C.; Dao, T.S.; Hoang, T.C. Copper toxicity and the influence of water quality of Dongnai River and Mekong River waters on copper bioavailability and toxicity to three tropical species. *Chemosphere*. **2016**, *144*, 872–878.

13. Charoy, C.; Janssen, C.R. The swimming behaviour of *Brachionus calyciflorus* (rotifer) under toxic stress: II. Comparative sensitivity of various behavioural criteria. *Chemosphere*. **1999**, *38*(14), 3247–3260.
14. Charry, M.P.; Northcott, G.L.; Gaw, S.; Keesing, V.; Costello, M.J.; Tremblay, L. A. Development of acute and chronic toxicity bioassays using the pelagic copepod *Gladioferens pectinatus*. *Ecotoxicol. Environ. Saf.*, **2019**, *174*, 611–617.
15. Chen, J.C.; Lin, C.H. (2001). Toxicity of copper sulfate for survival, growth, molting and feeding of juveniles of the tiger shrimp, *Penaeus monodon*. *Aquaculture*. **2001**, *192*(1), 55–65.
16. Clearwater, S.J.; Thompson, K.J.; Hickey, C.W. Acute toxicity of copper, zinc, and ammonia to larvae (Glochidia) of a native freshwater mussel *Echyridella menziesii* in New Zealand. *Arch. Environ. Contam. Toxicol.* **2014**, *66*, 213–226.
17. Clements, W.H.; Cadmus, P.; Brinkman, S.F. Responses of aquatic insects to Cu and Zn in stream microcosms: Understanding differences between single species tests and field responses. *Environ. Sci. Technol.* **2003**, *47*(13), 7506–7513.
18. De Schampelaere, K.A.; Janssen, C.R. A biotic ligand model predicting acute copper toxicity for *Daphnia magna*: The effects of calcium, magnesium, sodium, potassium, and pH. *Environ. Sci. Technol.* **2002**, *36*(1), 48–54.
19. Diz, F.R.; Araújo, C.V.; Moreno-Garrido, I.; Hampel, M.; Blasco, J. Short-term toxicity tests on the harpacticoid copepod *Tisbe battagliai*: Lethal and reproductive endpoints. *Ecotoxicol. Environ. Saf.* **2009**, *72*(7), 1881–1886.
20. Dos Santos Lima, J.C.; Neto, A.J.G.; de Pádua Andrade, D.; Freitas, E.C.; Moreira, R.A.; Miguel, M.; Daam, A.; Rocha, O. Acute toxicity of four metals to three tropical aquatic invertebrates: The dragonfly *Tramea cophyssa* and the ostracods *Chlamydotheca* sp. and *Strandesia trispinosa*. *Ecotoxicol. Environ. Saf.* **2019**, *180*, 535–541.
21. Fawaz, E.G.; Kamareddine, L.A.; Salam, D.A. Effect of algal surface area and species interactions in toxicity testing bioassays. *Ecotoxicol. Environ. Saf.* **2019**, *174*, 584–591.
22. Ferrando, M.D.; Andreu, E. Feeding behavior as an index of copper stress in *Daphnia magna* and *Brachionus calyciflorus*. *Comp. Biochem. Physiol. C: Pharmacol. Toxicol.* **1993**, *106*(2), 327–331.
23. Franco-de-Sá, J.F.O.; Val, A.L. Copper toxicity for *Scinax ruber* and *Rhinella granulosa* (Amphibia: Anura) of the Amazon: Potential of Biotic Ligand Model to predict toxicity in urban streams. *Acta Amazonica*. **2014**, *44*(4), 491–498.
24. Franklin, N.M.; Adams, M.S.; Stauber, J.L.; Lim, R.P. Development of an improved rapid enzyme inhibition bioassay with marine and freshwater microalgae using flow cytometry. *Arch. Environ. Contam. Toxicol.* **2001**, *40*(4), 469–480.
25. Girling, A.E.; Pascoe, D.; Janssen, C.R.; Peither, A.; Wenzel, A.; Schäfer, H.; Persoone, G. Development of methods for evaluating toxicity to freshwater ecosystems. *Ecotoxicol. Environ. Saf.* **2000**, *45*(2), 148–176.
26. Gerhardt, A.; Palmer, C. Copper tolerances of *Adenophlebia auriculata* (Eaton) 1884 (Insecta: Ephemeroptera) and *Burnupia stenochoria* Cawston 1932 (Gastropoda: Ancyliidae) in indoor artificial streams. *Sci. Total Environ.* **1998**, *215*(3), 217–229.
27. García-Muñoz, E.; Guerrero, F.; Parra, G. Effects of copper sulfate on growth, development, and escape behavior in *Epidalea calamita* embryos and larvae. *Arch. Environ. Contam. Toxicol.* **2009**, *56*(3), 557.
28. Giarratano, E.; Comoglio, L.; Amin, O. Heavy metal toxicity in *Exosphaeroma gigas* (Crustacea, Isopoda) from the coastal zone of Beagle Channel. *Ecotoxicol. Environ. Saf.* **2007**, *68*(3), 451–462.
29. Gissi, F.; Stauber, J.; Reichelt-Brushett, A.; Harrison, P.L.; Jolley, D.F. Inhibition in fertilisation of coral gametes following exposure to nickel and copper. *Ecotoxicol. Environ. Saf.* **2017**, *145*, 32–41.
30. Gorski, J.; Nugegoda, D. Sublethal toxicity of trace metals to larvae of the blacklip abalone, *Haliotis rubra*. *Environ. Toxicol. Chem.* **2006**, *25*(5), 1360–1367.
31. Harmon, S.M.; Specht, W.L.; Chandler, G.T. A comparison of the daphnids *Ceriodaphnia dubia* and *Daphnia ambigua* for their utilization in routine toxicity testing in the southeastern United States. *Arch. Environ. Contam. Toxicol.* **2003**, *45*(1), 0079–0085.
32. Herkovits, J.; Helguero, L.A. Copper toxicity and copper–zinc interactions in amphibian embryos. *Sci. Total Environ.* **1998**, *221*(1), 1–10.
33. Howe, P.L.; Reichelt-Brushett, A.J.; Clark, M.W. Development of a chronic, early life-stage sub-lethal toxicity test and recovery assessment for the tropical zooxanthellate sea anemone *Aiptasia pulchella*. *Ecotoxicol. Environ. Saf.* **2014**, *100*, 138–147.
34. Islam, M.A.; Blasco, J.; Araújo, C.V. Spatial avoidance, inhibition of recolonization and population isolation in zebrafish (*Danio rerio*) caused by copper exposure under a non-forced approach. *Sci. Total Environ.* **2019**, *653*, 504–511.
35. Kraak, M.H.; Toussaint, M.; Lavy, D.; Davids, C. Short-term effects of metals on the filtration rate of the zebra mussel *Dreissena polymorpha*. *Environ. Pollut.* **1994**, *84*(2), 139–143.
36. Koivisto, S.; Ketola, M.; Walls, M. Comparison of five cladoceran species in short-and long-term copper exposure. *Hydrobiologia*. **1992**, *248*(2), 125–136.
37. Laurer, M.M.; Bianchini, A. Chronic copper toxicity in the estuarine copepod *Acartia tonsa* at different salinities. *Environ. Toxicol. Chem.* **2010**, *29*, 2297–2303.
38. Lopes, I.; Baird, D.J.; Ribeiro, R. Avoidance of copper contamination by field populations of *Daphnia longispina*. *Environ. Toxicol. Chem.* **2004**, *23*(7), 1702–1708.
39. Lüderitz, V.; Nicklisch, A. The effect of pH on copper toxicity to blue-green algae. *Int. Rev. Der Gesamten Hydrobiol. Und Hydrographie*. **1989**, *74*(3), 283–291.
40. Manfra, L.; Canepa, S.; Piazza, V.; Faimali, M. Lethal and sublethal endpoints observed for *Artemia* exposed to two reference toxicants and an ecotoxicological concern organic compound. *Ecotoxicol. Environ. Saf.* **2016**, *123*, 60–64.
41. Moreira-Santos, M.; Donato, C.; Lopes, I.; Ribeiro, R. Avoidance tests with small fish: Determination of the median avoidance concentration and of the lowest-observed-effect gradient. *Environ. Toxicol. Chem.* **2008**, *27*(7), 1576–1582.
42. Moreno Garrido, I.; Lubián, L.M.; Soares, A.M.V.M. Oxygen production rate as a test for determining toxicity of copper to *Rhodomonas salina* Hill and Wehterbee (Cryptophyceae). *Bull. Environ. Contam. Toxicol.* **1999**, *62*(6), 776–782.

43. Moreno-Garrido, I.; Lubián, L.M.; Soares, A.M. Influence of cellular density on determination of EC50 in microalgal growth inhibition tests. *Ecotoxicol. Environ. Saf.* **2000**, *47*(2), 112–116.
44. Morroni, L.; Pinsino, A.; Pellegrini, D.; Regoli, F. Reversibility of trace metals effects on sea urchin embryonic development. *Ecotoxicol. Environ. Saf.* **2018**, *148*, 923–929.
45. Nonnotte, L.; Boitel, F.; Truchot, J.P. Waterborne copper causes gill damage and hemolymph hypoxia in the shore crab *Carcinus maenas*. *Canadian J. Zool.* **1993**, *71*(8), 1569–1576.
46. Naddy, R.B.; Cohen, A.S.; Stubblefield, W.A. The interactive toxicity of cadmium, copper, and zinc to *Ceriodaphnia dubia* and rainbow trout (*Oncorhynchus mykiss*). *Environ. Toxicol. Chem.* **2015**, *34*(4), 809–815.
47. Oliveira, B.L.; Fernandes, L.F.L.; Bianchini, A.; Chippari-Gomes, A.R.; Silva, B.F.; Brandão, G.P.; Gomes, L.C. Acute copper toxicity in juvenile fat snook *Centropomus parallelus* (Teleostei: Centropomidae) in sea water. *Neotrop. Ichthyol.* **2014**, *12*, 845–852.
48. Rosen, G.; Miller, K. A postexposure feeding assay using the marine polychaete *Neanthes arenaceodentata* suitable for laboratory and in situ exposures. *Environ. Toxicol. Chem.* **2011**, *30*(3), 730–737.
49. Rotini, A.; Gallo, A.; Parlapiano, I.; Berducci, M.T.; Boni, R.; Tosti, E.; Prato, E.; Maggi, C.; Cicero, A.M.; Migliore, L.; Manfra, L. Insights into the CuO nanoparticle ecotoxicity with suitable marine model species. *Ecotoxicol. Environ. Saf.* **2018**, *147*, 852–860.
50. Pérez-García, A.; Codina, J.C.; Cazorla, F.M.; de Vicente, A. Rapid respirometric toxicity test: Sensitivity to metals. *Bull. Environ. Contam. Toxicol.* **1993**, *50*, 703–708.
51. Pérez-Legaspi, I.A.; Rico-Martínez, R.; Pineda-Rosas, A. Toxicity testing using esterase inhibition as a biomarker in three species of the genus *Lecane* (Rotifera). *Environ. Toxicol. Chemistry*. **2002**, *21*(4), 776–782.
52. Qiu, J.W.; Thiagarajan, V.; Cheung, S.; Qian, P.Y. Toxic effects of copper on larval development of the barnacle *Balanus amphitrite*. *Mar. Pollut. Bulletin*. **2005**, *51*(8–12), 688–693.
53. Redondo-López, S.; Mena, F.; González-Ortegón, E.; Araújo, C.V.M. Dissimilar behavioral and spatial avoidance responses by shrimps from tropical and temperate environments exposed to copper. *Environ Toxicol Chem.* (under review).
54. Shuhaimi-Othman, M.; Yakub, N.; Ramle, N.A.; Abas, A. Comparative toxicity of eight metals on freshwater fish. *Toxicol. Indust. Health*. **2015**, *31*(9), 773–782.
55. Silva, D.C.; Araújo, C.V.; Marassi, R.J.; Cardoso-Silva, S.; Neto, M.B.; Silva, G.C.; Ribeiro, R.; Silva, F.T.; Paiva, T.C.B.; Pompêo, M.L. Influence of interspecific interactions on avoidance response to contamination. *Sci. Total Environ.* **2018**, *642*, 824–831.
56. Soares, M.P.; Jesus, F.; Almeida, A.R.; Zlabek, V.; Grabic, R.; Domingues, I.; Hayd, L. Endemic shrimp *Macrobrachium pantanulense* as a test species to assess potential contamination by pesticides in Pantanal (Brazil). *Chemosphere*. **2017**, *168*, 1082–1092.
57. Snell, T.W.; Johnston, R.K.; Matthews, A.B.; Park, N.; Berry, S.; Brashear, J. Using *Proales similis* (Rotifera) for toxicity assessment in marine waters. *Environ. Toxicol.* **2019**, *34*(5), 634–644.
58. Stauber, J.L.; Binet, M.T.; Bao, V.W.; Boge, J.; Zhang, A.Q.; Leung, K.M.; Adams, M.S. Comparison of the Qwiklite™ algal bioluminescence test with marine algal growth rate inhibition bioassays. *Environ. Toxicol.* **2008**, *23*(5), 617–625.
59. Trenfield, M.A.; van Dam, J.W.; Harford, A.J.; Parry, D.; Streten, C.; Gibb, K.; van Dam, R.A. A chronic toxicity test for the tropical marine snail *Nassarius dorsatus* to assess the toxicity of copper, aluminium, gallium, and molybdenum. *Environ. Toxicol. Chem.* **2016**, *35*(7), 1788–1795.
60. Trenfield, M.A.; van Dam, J.W.; Harford, A.J.; Parry, D.; Streten, C.; Gibb, K.; van Dam, R.A. Assessing the chronic toxicity of copper and aluminium to the tropical sea anemone *Exaiptasia pallida*. *Ecotoxicol. Environ. Saf.* **2017**, *139*, 408–415.
61. Toussaint, M.W.; Shedd, T.R.; van der Schalie, W.H.; Leather, G.R. A comparison of standard acute toxicity tests with rapid-screening toxicity tests. *Environ. Toxicol. Chem.* **1995**, *14*(5), 907–915.
62. Vera-Vera, V.C.; Guerrero, F.; Blasco, J.; Araújo, C.V. Habitat selection response of the freshwater shrimp *Atyaephyra desmarestii* experimentally exposed to heterogeneous copper contamination scenarios. *Sci. Total Environ.* **2019**, *662*, 816–823.
63. Vieira, L.R.; Gravato, C.; Soares, A.M.V.M.; Morgado, F.; Guilhermino, L. Acute effects of copper and mercury on the estuarine fish *Pomatoschistus microps*: Linking biomarkers to behaviour. *Chemosphere*. **2009**, *76*(10), 1416–1427.
64. Weir, S.M.; Yu, S.; Scott, D.E.; Lance, S.L. Acute toxicity of copper to the larval stage of three species of ambystomatid salamanders. *Ecotoxicology*. **2019**, *28*(9), 1023–1031.
65. Wong, C.K.; Pak, A.P. Acute and subchronic toxicity of the heavy metals copper, chromium, nickel, and zinc, individually and in mixture, to the freshwater copepod *Mesocyclops pehpeiensis*. *Bull. Environ. Contam. Toxicol.* **2004**, *73*, 190–196.
66. Zapata, V.; Greco, L.L.; Rodríguez, E.M. Effect of copper on hatching and development of larvae of the estuarine crab *Chasmagnathus granulata* (Decapoda, Brachyura). *Environ. Toxicol. Chem.* **2001**, *20*(7), 1579–1583.
67. Alberdi, J.L.; Sáenz, M.E.; Di Marzio, W.D.; Tortorelli, M.C. Comparative acute toxicity of two herbicides, paraquat and glyphosate, to *Daphnia magna* and *D. spinulata*. *Bull. Environ. Contam. Toxicol.* **1996**, *57*(2), 229–235.
68. Anton, F.A.; Ariz, M.; Alia, M. Ecotoxic effects of four herbicides (glyphosate, alachlor, chlortoluron and isoproturon) on the algae *Chlorella pyrenoidosa* Chick. *Sci. Total Environ.* **1993**, *134*, 845–851.
69. Demetrio, P.M.; Bonetto, C.; Ronco, A.E. The effect of cypermethrin, chlorpyrifos, and glyphosate active ingredients and formulations on *Daphnia magna* (Straus). *Bull. Environ. Contam. Toxicol.* **2014**, *93*(3), 268–273.
70. Folmar, L.C.; Sanders, H.O.; Julin, A.M. Toxicity of the herbicide glyphosate and several of its formulations to fish and aquatic invertebrates. *Arch. Environ. Contam. Toxicol.* **1979**, *8*(3), 269–278.
71. Hernández-García, C.I.; Martínez-Jerónimo, F. Multistressor negative effects on an experimental phytoplankton community. The case of glyphosate and one toxigenic cyanobacterium on *Chlorophycean microalgae*. *Sci. Total Environ.* **2020**, *717*, 137186.
72. Lipok, J.; Studnik, H.; Gruyaert, S. The toxicity of Roundup® 360 SL formulation and its main constituents: Glyphosate and isopropylamine towards non-target water photoautotrophs. *Ecotoxicol. Environ. Saf.* **2010**, *73*(7), 1681–1688.

73. Ma, J.; Li, X. Alteration in the cytokine levels and histopathological damage in common carp induced by glyphosate. *Chemosphere*. **2015**, *128*, 293–298.
74. Mann, R.M.; Bidwell, J.R. The toxicity of glyphosate and several glyphosate formulations to four species of southwestern Australian frogs. *Arch. Environ. Contamin. Toxicology*. **1999**, *36*(2), 193–199.
75. Mena, F.; Romero, A.; Blasco, J.; Araújo, C.V.M. Can a mixture of agrochemicals (glyphosate, chlorpyrifos and chlorothalonil) mask the perception of an individual chemical? A hidden trap underlying ecological risk. *Environ. Pollut. (under review)*.
76. Nešković, N.K.; Poleksić, V.; Elezović, I.; Karan, V.; Budimir, M. Biochemical and histopathological effects of glyphosate on carp, *Cyprinus carpio* L. *Bull. Environ. Contam. Toxicol.* **1996**, *56*(2), 295–302.
77. Perkins, P.J.; Boermans, H.J.; Stephenson, G.R. Toxicity of glyphosate and triclopyr using the frog embryo teratogenesis assay—*Xenopus*. *Environ. Toxicol. Chem.: An International Journal*. **2000**, *19*(4), 940–945.
78. Rodríguez-Gil, J.L.; Prosser, R.; Poirier, D.; Lissemore, L.; Thompson, D.; Hanson, M.; Solomon, K.R. Aquatic hazard assessment of MON 0818, a commercial mixture of alkylamine ethoxylates commonly used in glyphosate-containing herbicide formulations. Part 1: Species sensitivity distribution from laboratory acute exposures. *Environ. Toxicol. Chem.* **2017**, *36*(2), 501–511.
79. Romero, D.M.; de Molina, M.C.R.; Juárez, Á.B. Oxidative stress induced by a commercial glyphosate formulation in a tolerant strain of *Chlorella kessleri*. *Ecotoxicol. Environ. Saf.* **2011**, *74*(4), 741–747.
80. Sikorski, Ł.; Baciak, M.; Bęś, A.; Adomas, B. The effects of glyphosate-based herbicide formulations on *Lemna minor*, a non-target species. *Aquat. Toxicol.* **2019**, *209*, 70–80.
81. Smedbol, É.; Lucotte, M.; Labrecque, M.; Lepage, L.; Juneau, P. Phytoplankton growth and PSII efficiency sensitivity to a glyphosate-based herbicide (Factor 540®). *Aquat. Toxicol.* **2017**, *192*, 265–273.
82. Tsui, M.T.K.; Chu, L.M. Aquatic toxicity of glyphosate-based formulations: Comparison between different organisms and the effects of environmental factors. *Chemosphere*. **2003**, *52*, 1189–1197.
83. Iummato, M.M.; Fassiano, A.; Graziano, M.; Afonso, M.S.; Molina, M.C.R.; Juárez, A.B. Effect of glyphosate on the growth, morphology, ultrastructure and metabolism of *Scenedesmus vacuolatus*. *Ecotoxicol. Environ. Saf.* **2019**, *172*, 471–479.
84. Wagner, N.; Veith, M.; Lötters, S.; Viertel, B. Population and life-stage-specific effects of two herbicide formulations on the aquatic development of European common frogs (*Rana temporaria*). *Environ. Toxicol. Chem.* **2017**, *36*(1), 190–200.
85. Wojtaszek, B.F.; Staznik, B.; Chartrand, D.T.; Stephenson, G.R.; Thompson, D.G. Effects of Vision® herbicide on mortality, avoidance response, and growth of amphibian larvae in two forest wetlands. *Environ. Toxicol. Chem: An International Journal*. **2004**, *23*(4), 832–842.
86. Zhang, Q.; Qu, Q.; Lu, T.; Ke, M.; Zhu, Y.; Zhang, M.; Zhang, Z.; Du, B.; Pan, X.; Sun, L.; Qian, H. The combined toxicity effect of nanoplastics and glyphosate on *Microcystis aeruginosa* growth. *Environ. Pollut.* **2018**, *243*, 1106–1112.
87. Angel, B.M.; Batley, G.E.; Jarolimek, C.V.; Rogers, N.J. The impact of size on the fate and toxicity of nanoparticulate silver in aquatic systems. *Chemosphere*. **2013**, *93*(2), 359–365.
88. Asghari, S.; Johari, S.A.; Lee, J.H.; Kim, Y.S.; Jeon, Y.B.; Choi, H.J.; Yu, I.J. Toxicity of various silver nanoparticles compared to silver ions in *Daphnia magna*. *Jour. Nanobiotech.* **2012**, *10*(1), 14.
89. Bielmyer-Fraser, G.K.; Jarvis, T.A.; Lenihan, H.S.; Miller, R.J. Cellular partitioning of nanoparticulate versus dissolved metals in marine phytoplankton. *Environ. Sci. Technol.* **2014**, *48*(22), 13443–13450.
90. Burchardt, A.D.; Carvalho, R.N.; Valente, A.; Nativo, P.; Gilliland, D.; García, C.P.; Passarella, R.; Pedroni, V.; Rossi, F.; Lettieri, T. Effects of silver nanoparticles in diatom *Thalassiosira pseudonana* and cyanobacterium *Synechococcus* sp. *Environ. Sci. Technol.* **2012**, *46*(20), 11336–11344.
91. Blinova, I.; Niskanen, J.; Kajankari, P.; Kanarbik, L.; Kärkinen, A.; Tenhu, H.; Kahru, A. Toxicity of two types of silver nanoparticles to aquatic crustaceans *Daphnia magna* and *Thamnocephalus platyurus*. *Environ. Sci. Poll. Resear.* **2013**, *20*(5), 3456–3463.
92. Chae, Y.J.; Pham, C.H.; Lee, J.; Bae, E.; Yi, J.; Gu, M.B. Evaluation of the toxic impact of silver nanoparticles on Japanese medaka (*Oryzias latipes*). *Aquat. Toxicol.* **2009**, *94*(4), 320–327.
93. Dewez, D.; Oukarroum, A. Silver nanoparticles toxicity effect on photosystem II photochemistry of the green alga *Chlamydomonas reinhardtii* treated in light and dark conditions. *Toxicol. Environ. Chem.* **2012**, *94*(8), 1536–1546.
94. Ellegaard-Jensen, L.; Jensen, K.A.; Johansen, A. Nano-silver induces dose-response effects on the nematode *Caenorhabditis elegans*. *Ecotoxicol. Environ. Saf.* **2012**, *80*, 216–223.
95. Gil-Allué, C.; Schirmer, K.; Tlili, A.; Gessner, M.O.; Behra, R. Silver nanoparticle effects on stream periphyton during short-term exposures. *Environ. Sci. Technol.* **2015**, *49*(2), 1165–1172.
96. Govindasamy, R.; Rahuman, A.A. Histopathological studies and oxidative stress of synthesized silver nanoparticles in Mozambique tilapia (*Oreochromis mossambicus*). *Jour. Environ. Sci.* **2012**, *24*(6), 1091–1098.
97. Griffith, R.J.; Luo, J.; Gao, J.; Bonzongo, J.C.; Barber, D.S. Effects of particle composition and species on toxicity of metallic nanomaterials in aquatic organisms. *Environ. Toxicol. Chem.* **2008**, *27*, 1972–1978.
98. Gubbins, E.J.; Batty, L.C.; Lead, J.R. Phytotoxicity of silver nanoparticles to *Lemna minor* L. *Environ. Pollut.* **2011**, *159*(6), 1551–1559.
99. Hoheisel, S.M.; Diamond, S.; Mount, D. Comparison of nanosilver and ionic silver toxicity in *Daphnia magna* and *Pimephales promelas*. *Environ. Toxicol. Chem.* **2012**, *31*(11), 2557–2563.
100. Jiang, H.S.; Li, M.; Chang, F.Y.; Li, W.; Yin, L.Y. Physiological analysis of silver nanoparticles and AgNO<sub>3</sub> toxicity to *Spirodela polyrrhiza*. *Environ. Toxicol. Chem.* **2012**, *31*(8), 1880–1886.
101. Jo, H.J.; Choi, J.W.; Lee, S.H.; Hong, S.W. Acute toxicity of Ag and CuO nanoparticle suspensions against *Daphnia magna*: The importance of their dissolved fraction varying with preparation methods. *J. Hazard. Mater.* **2012**, *22–228*, 301–308.

102. Kashiwada, S.; Ariza, M.E.; Kawaguchi, T.; Nakagame, Y.; Jayasinghe, B. S.; Gärtner K.; Kagami, Y.; Sabo-Attwood, S.; Ferguson, P.L.; Chandler, G.T. Silver nanocolloids disrupt medaka embryogenesis through vital gene expressions. *Environ. Sci. Technol.* **2012**, *46*, 6278–6287.
103. Kennedy, A.J.; Hull, M.S.; Bednar, A.J.; Goss, J.D.; Gunter, J.C.; Bouldin, J.L.; Vikesland, P.J.; Steevens, J.A. Fractionating nanosilver: Importance for determining toxicity to aquatic test organisms. *Environ. Sci. Tech.* **2010**, *44*(24), 9571–9577.
104. Kennedy, A.J.; Chappell, M.A.; Bednar, A.J.; Ryan, A.C.; Laird, J.G.; Stanley, J.K.; Steevens, J.A. Impact of organic carbon on the stability and toxicity of fresh and stored silver nanoparticles. *Environ. Sci. Technol.* **2012**, *46*, 10772–10780.
105. Kim, J.; Kim, S.; Lee, S. Differentiation of the toxicities of silver nanoparticles and silver ions to the Japanese medaka (*Oryzias latipes*) and the cladoceran *Daphnia magna*. *Nanotoxicology*. **2011**, *5*(2), 208–214.
106. Kwok, K.W.; Auffan, M.; Badireddy, A.R.; Nelson, C.M.; Wiesner, M.R.; Chilkoti, A.; Hinton, D.E. Uptake of silver nanoparticles and toxicity to early life stages of Japanese medaka (*Oryzias latipes*): Effect of coating materials. *Aquat. Toxicol.* **2012**, *120*, 59–66.
107. Laban, G.; Nies, L.F.; Turco, R.F.; Bickham, J.W.; Sepúlveda, M.S. The effects of silver nanoparticles on fathead minnow (*Pimephales promelas*) embryos. *Ecotoxicology*. **2010**, *19*(1), 185–195.
108. Lee, Y.J.; Kim, J.; Oh, J.; Bae, S.; Lee, S.; Hong, I.S.; Kim, S.H. Ion-release kinetics and ecotoxicity effects of silver nanoparticles. *Environ. Toxicol. Chem.* **2012**, *31*(1), 155–159.
109. McLaughlin, J.; Bonzongo, J.-C. J. Effects of natural water chemistry on nanosilver behavior and toxicity to *Ceriodaphnia dubia* and *Pseudokirchneriella subcapitata*. *Environ. Toxicol. Chem.* **2012**, *31*, 168–175.
110. Navarro, E.; Piccapietra, F.; Wagner, B.; Marconi, F.; Kaegi, R.; Odzak, N.; Sigg, L.; Behra, R. Toxicity of silver nanoparticles to *Chlamydomonas reinhardtii*. *Environ. Sci. Technol.* **2008**, *42*(23), 8959–8964.
111. Pérez, S.; Moreno-Garrido, I.; Capitán-Valley, L.F.; Lapresta-Fernández, A.; Lubián, L.M.; Blasco, J., 2014. Toxicity of silver and gold-silver alloy nanoparticles in the marine and freshwater microalgae. In: Abstracts of the IV Congress of Marine Sciences. Las Palmas de Gran Canaria, Spain, June 11th to 13th, 2014.
112. Piccapietra, F.; Allué, C.G.; Sigg, L.; Behra, R. Intracellular silver accumulation in *Chlamydomonas reinhardtii* upon exposure to carbonate coated silver nanoparticles and silver nitrate. *Environ. Sci. Technol.* **2012**, *46*(13), 7390–7397.
113. Poynton, H.C.; Lazorchak, J.M.; Impelliteri, C.A.; Blalock, B.J.; Rogers, K.; Allen H. J.; Loguinov, A.; Heckman, J.L.; Govindaswamy, S. Toxicogenomic responses of nanotoxicity in *Daphnia magna* exposed to silver nitrate and coated silver nanoparticles. *Environ. Sci. Technol.* **2012**, *46*, 6288–6296.
114. Ribeiro, F.; Gallego-Urrea, J.A.; Jurkschat, K.; Crossley, A.; Hassellöv, M.; Taylor, C.; Loureiro, S. Silver nanoparticles and silver nitrate induce high toxicity to *Pseudokirchneriella subcapitata*, *Daphnia magna* and *Danio rerio*. *Science of the Total Environment*. **2014**, *466*, 232–241.
115. Sendra, M.; Yeste, M.P.; Gatica, J.M.; Moreno-Garrido, I.; Blasco, J. Direct and indirect effects of silver nanoparticles on freshwater and marine microalgae (*Chlamydomonas reinhardtii* and *Phaeodactylum tricornutum*). *Chemosphere*. **2017**, *179*, 279–289.
116. Sendra, M.; Blasco, J.; Araújo, C.V. Is the cell wall of marine phytoplankton a protective barrier or a nanoparticle interaction site? Toxicological responses of *Chlorella autotrophica* and *Dunaliella salina* to Ag and CeO<sub>2</sub> nanoparticles. *Ecol. Indic.* **2018**, *95*, 1053–1067.
117. Tuominen, M.; Sillanpää, M.; Schultz, E. Toxicity and stability of silver nanoparticles to the green alga *Pseudokirchneriella subcapitata* in boreal freshwater samples and growth alga. *Nanomater. Environ.* **2013**, *48*–57.
118. Wang, Z.; Chen, J.; Li, X.; Shao, J.; Peijnenburg, W.J.G.M. Aquatic toxicity of nanosilver colloids to different trophic organisms: Contributions of particles and free silver ion. *Environ. Toxicol. Chem.* **2012**, *31*, 2408–2413.
119. Wu, Y.; Zhou, Q. Silver nanoparticles cause oxidative damage and histological changes in medaka (*Oryzias latipes*) after 14 days of exposure. *Environ. Toxicol. Chem.* **2013**, *32*(1), 165–173.
120. Zhao, C.M.; Wang, W.X. Comparison of acute and chronic toxicity of silver nanoparticles and silver nitrate to *Daphnia magna*. *Environ. Toxicol. Chem.* **2011**, *30*, 885–892.
